# Supplementary material
Source: PubMed Central journal article supplement (PMC6644086)
Supplement: ao8b02261_si_001.pdf [file ao8b02261_si_001.pdf]

## Supporting Information

### **Unveiling the Effect of the Structure of Carbon Material on the Charge Storage Mechanism in MoS<sub>2</sub>-Based Supercapacitors**

Basant A. Ali<sup>1</sup>, Ossama I. Metwalli<sup>2</sup>, Ahmed S. G. Khalil<sup>2</sup>, Nageh K. Allam<sup>1,\*</sup>

<sup>1</sup>Energy Materials Laboratory, School of Sciences and Engineering, The American University in Cairo, New Cairo 11835, Egypt.

<sup>2</sup>Physics Department, Center for Environmental and Smart Technology, Faculty of Science, Fayoum University, Fayoum 63514, Egypt.

\*Email: [nageh.allam@aucegypt.edu](mailto:nageh.allam@aucegypt.edu)

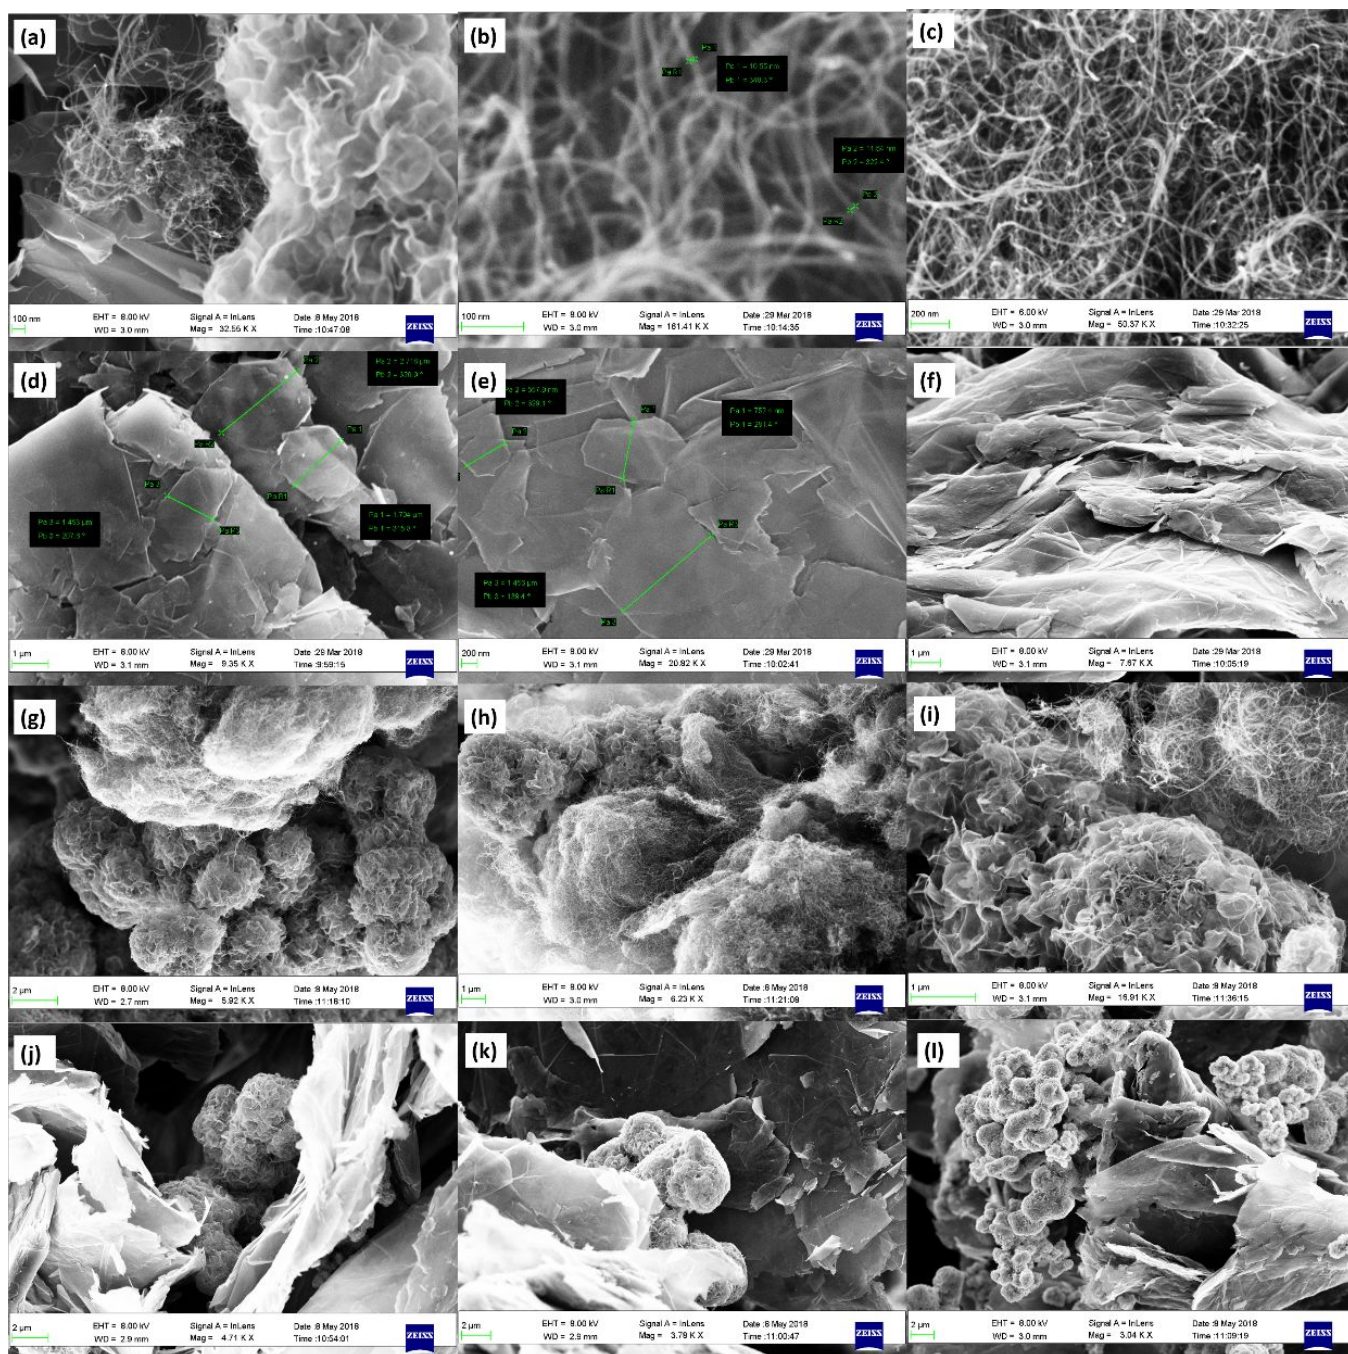

**Figure S1** SEM images of (a) MCG, (b)-(c) CNT, (d)-(f) GN, (g) MCNT 1:1, (h) MCNT 1:3, (i) MCNT 3:1, (j) MGNF 1:1, (k) MGNF 1:3, (l) MGNF 3:1.

**Table S1** Active surface area of the studied composite active materials.

| Material         | BET value m <sup>2</sup> /g |
|------------------|-----------------------------|
| MoS <sub>2</sub> | 6.9851                      |
| MCNT1:1          | 128.6986                    |
| MCNT1:3          | 180.6995                    |
| MCNT3:1          | 35.3578                     |
| MGNF1:1          | 4.4570                      |
| MGNF1:3          | 5.8126                      |
| MGNF3:1          | 6.0841                      |
| MCG              | 95.3127                     |

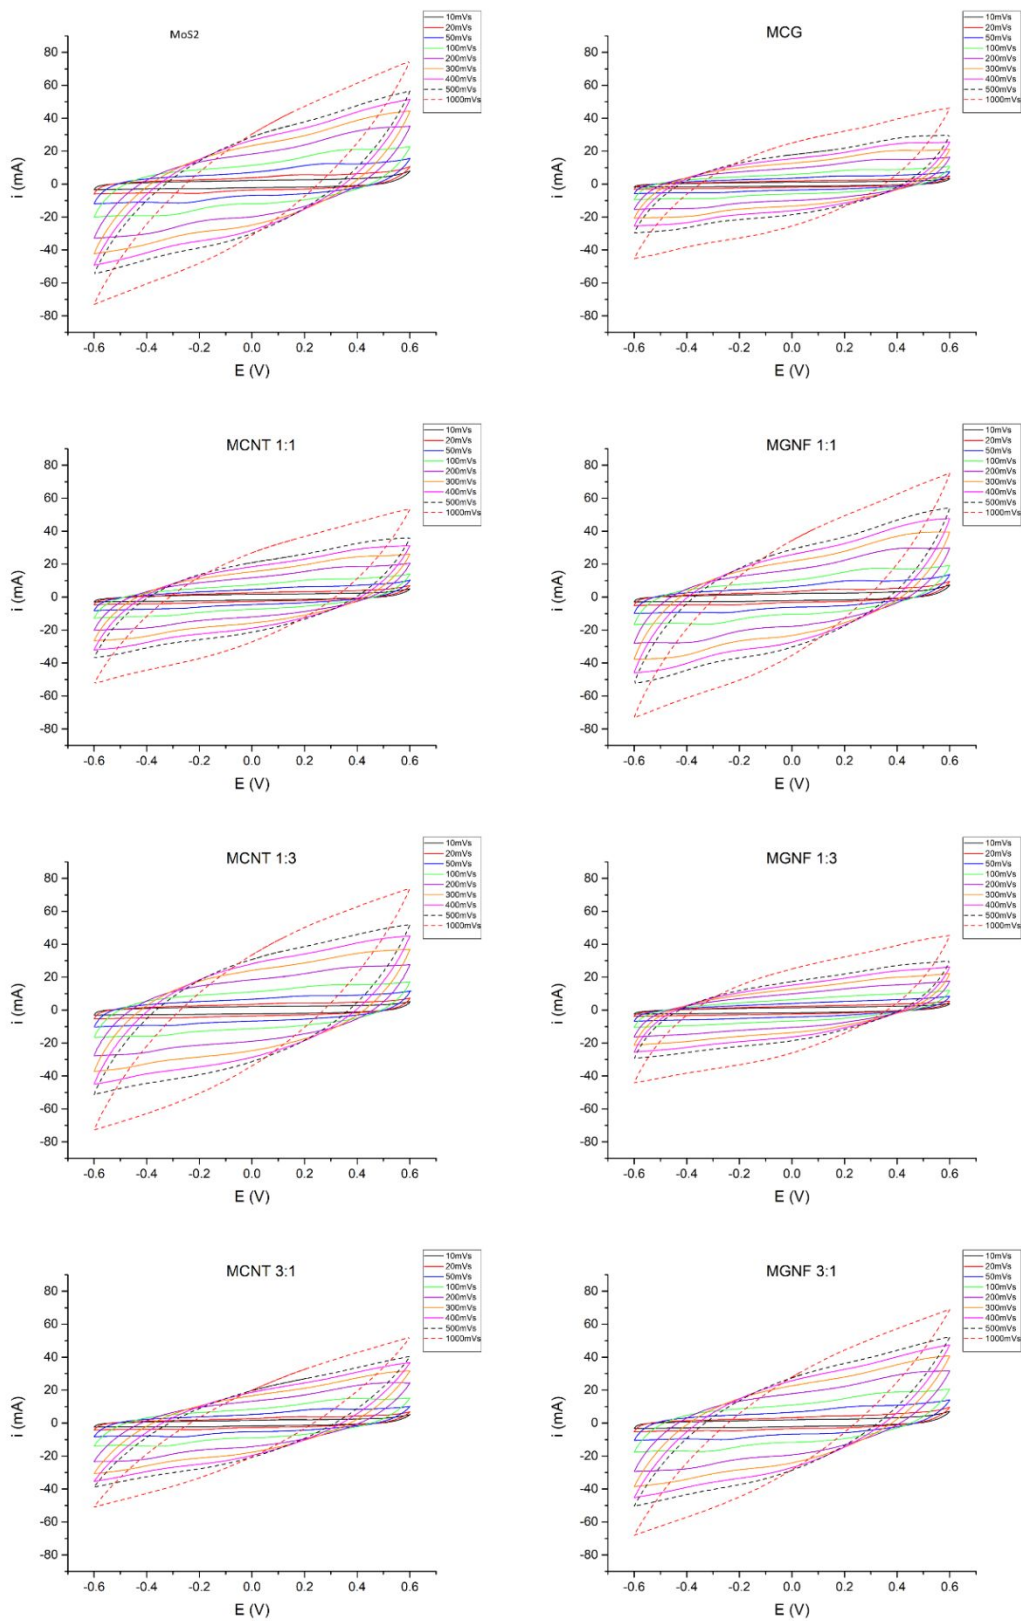

Figure S2 CV of the studied materials at different scan rates.

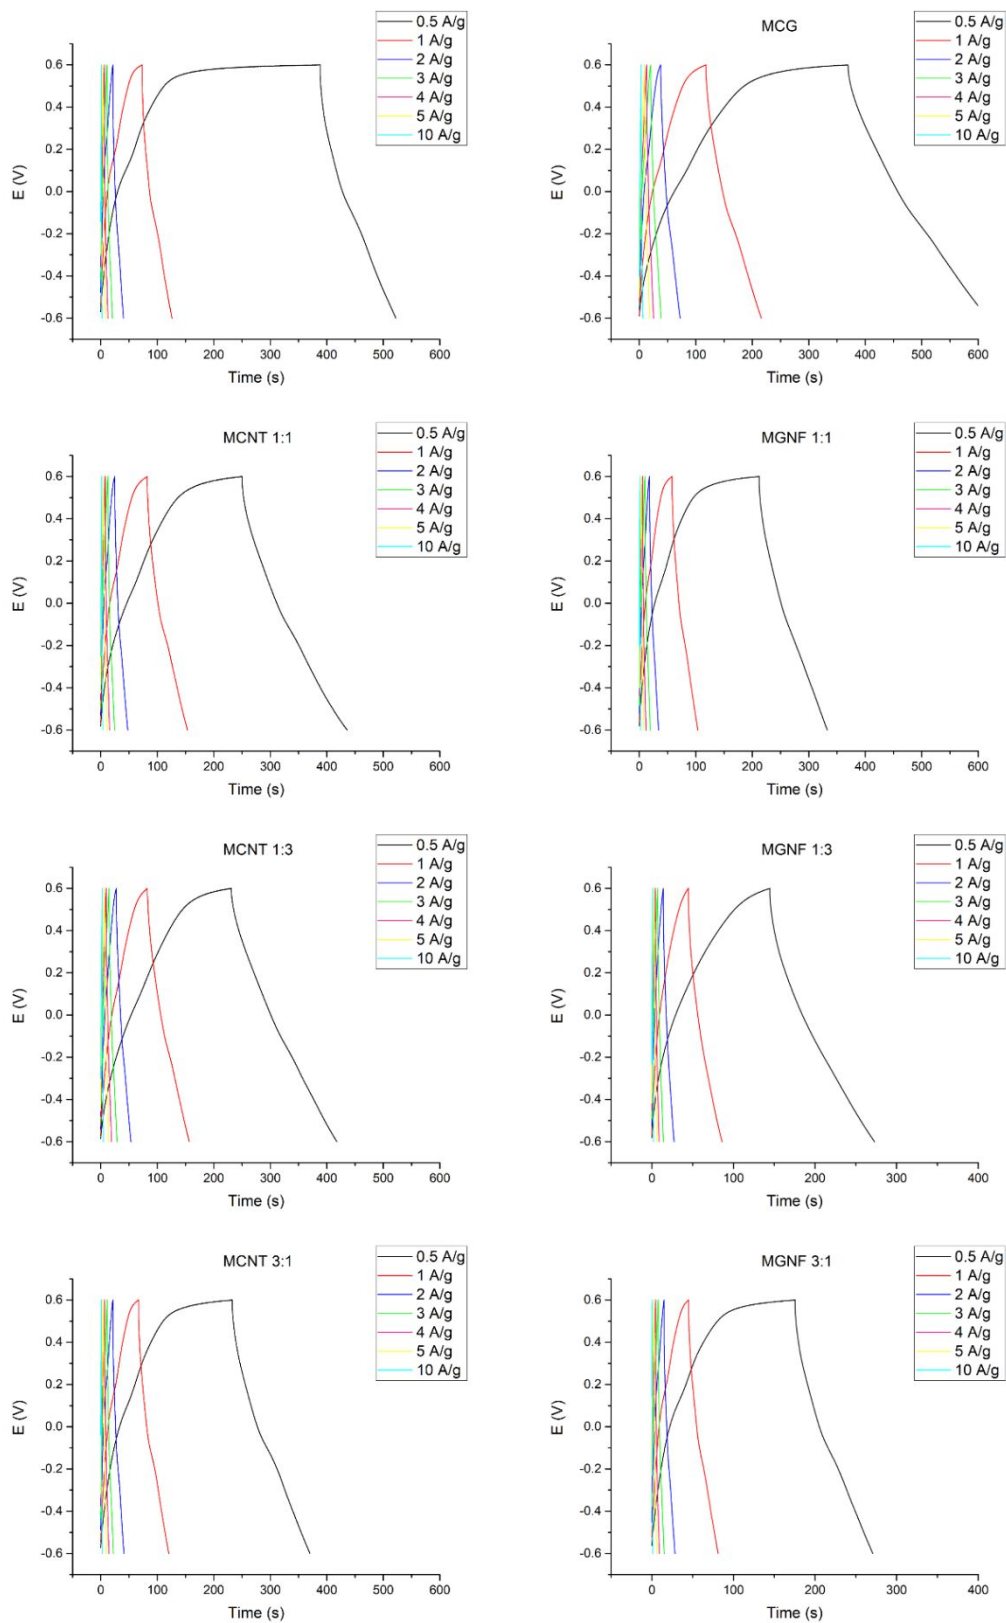

**Figure S3** Charge/discharge diagrams for the studied materials at different current densities.

**Table S2** Resistance parameters of the fitted equivalent circuit for the studied materials. R1 is the resistance of the solution, R2 the resistance of the

| <b>Parameter</b> | <b>MoS<sub>2</sub></b> | <b>MCG</b> | <b>MCNT 1:1</b> | <b>MCNT 1:3</b> | <b>MCNT 3:1</b> | <b>MGNF 1:1</b> | <b>MGNF 1:3</b> | <b>MGNF 3:1</b> |
|------------------|------------------------|------------|-----------------|-----------------|-----------------|-----------------|-----------------|-----------------|
| <b>R1</b>        | 5.858                  | 4.999      | 4.944           | 4.15            | 6.858           | 3.655           | 4.979           | 5.314           |
| <b>R2</b>        | 94.23                  | 98.37      | 105.4           | 476.4           | 89.77           | 181.2           | 65.64           | 240.9           |
| <b>W</b>         | 2.297                  | 7.131      | 7.169           | 3.876           | 4.986           | 4.972           | 4.597           | 3.407           |
